# Supplementary material for: Effect of Silver Doping on the Superconducting and Structural Properties of YBCO Films Grown by PLD on Different Templates
Source: MDPI journal article supplement (doi:10.3390/ma15155354), 2022-08-03
Supplement: s1 [file s1]

Article

# Effect of Silver Doping on the Superconducting and Structural Properties of YBCO Films Grown by PLD on Different Templates

Ilya A. Shipulin <sup>1,2,\*</sup>, Aleena Anna Thomas <sup>1,2</sup>, Sigrid Holleis <sup>3</sup>, Michael Eisterer <sup>3</sup>, Kornelius Nielsch <sup>1,4,5</sup> and Ruben Hühne <sup>1</sup>

<sup>1</sup> Institute for Metallic Materials, Leibniz-IFW Dresden, 01069 Dresden, Germany

<sup>2</sup> School of Science, TU Dresden, 01062 Dresden, Germany

<sup>3</sup> Atominstitut, TU Wien, Stadionallee 2, 1020 Vienna, Austria

<sup>4</sup> Institute of Materials Science, TU Dresden, 01062 Dresden, Germany

<sup>5</sup> Institute of Applied Physics, TU Dresden, 01062 Dresden, Germany

\* Correspondence: i.shipulin@ifw-dresden.de or shipuliniliya@gmail.com

## Surface morphology

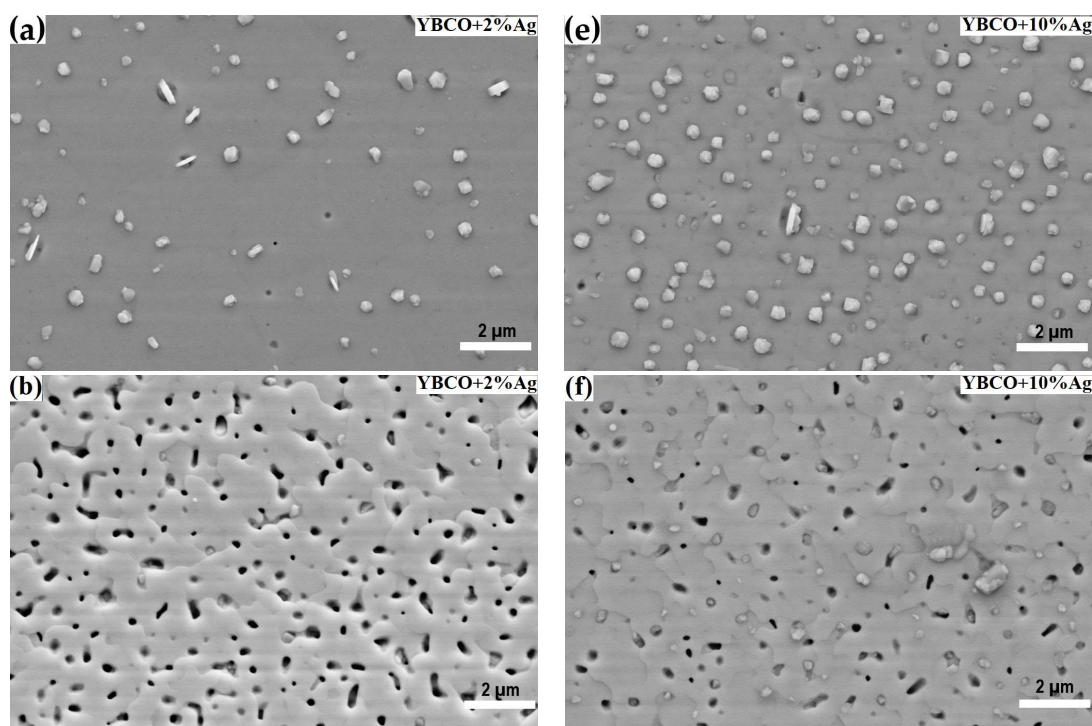

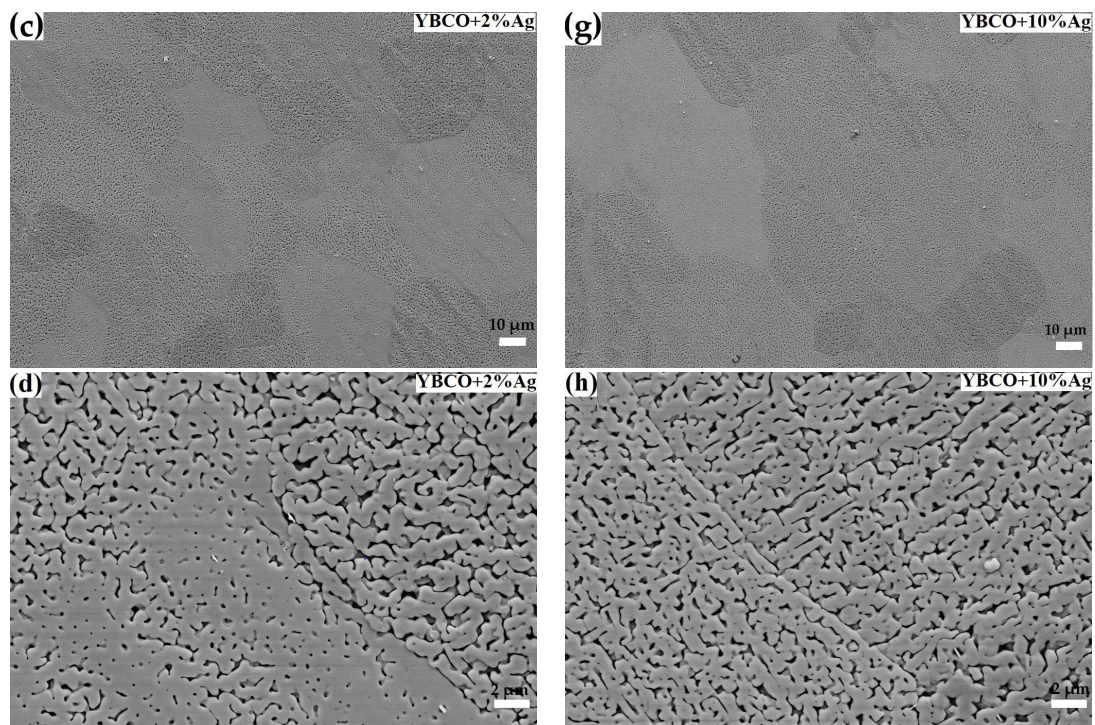

**Figure S1.** SEM images of the undoped and Ag-doped YBCO films on (a), (e) – STO, (b), (f) – IBAD-MgO, and (c,g), (d,h) – RABiTS templates.



## EBSD measurements

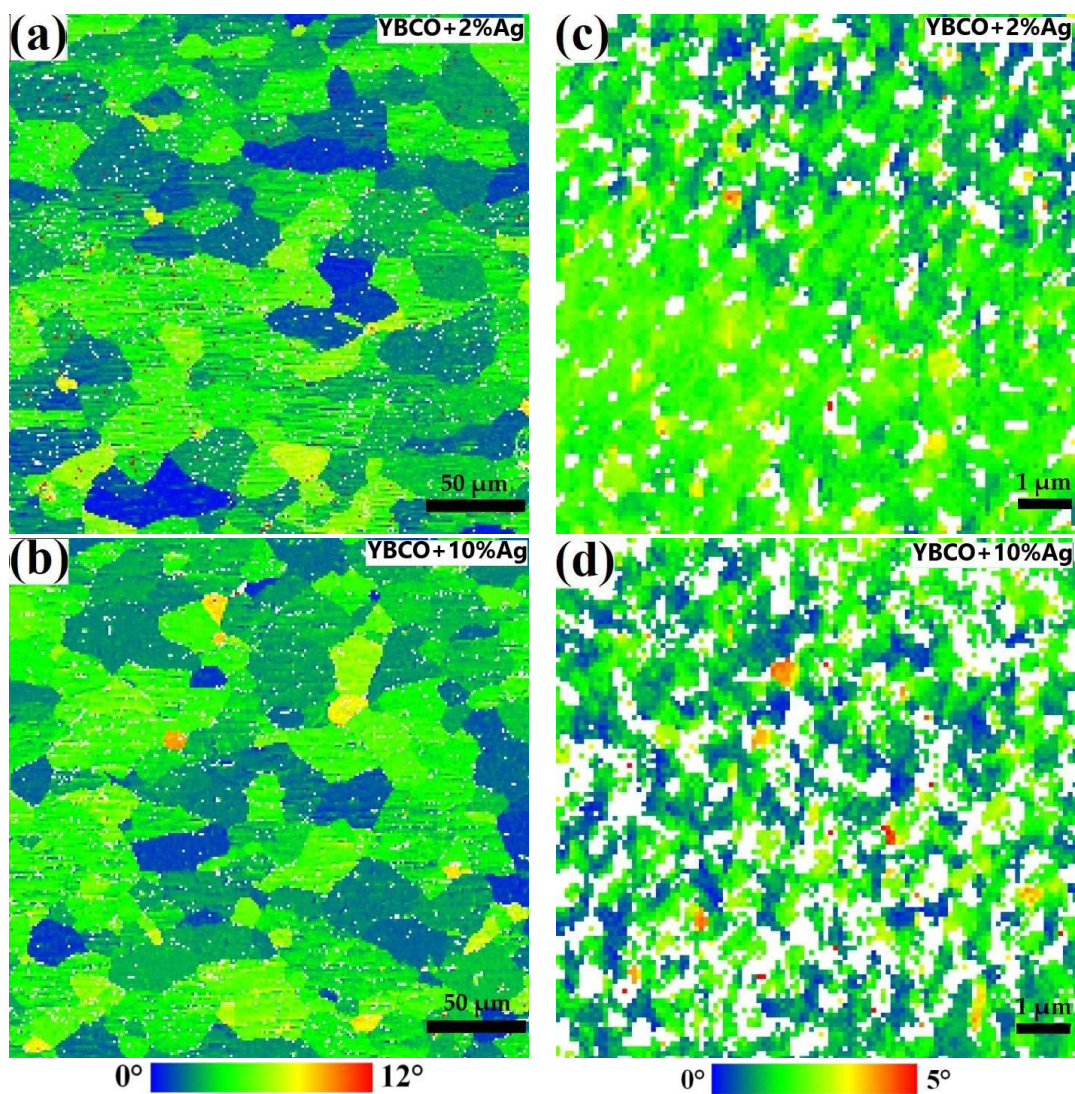

**Figure S2.** EBSD maps of the absolute misorientation from the ideal cube texture without noise reduction for undoped and Ag-doped YBCO films on (a-b) – RABiTS (step size 1.0 μm) and (c-d) – IBAD-MgO (step size 0.02 μm). White dots are non-indexed areas.

## Transport properties

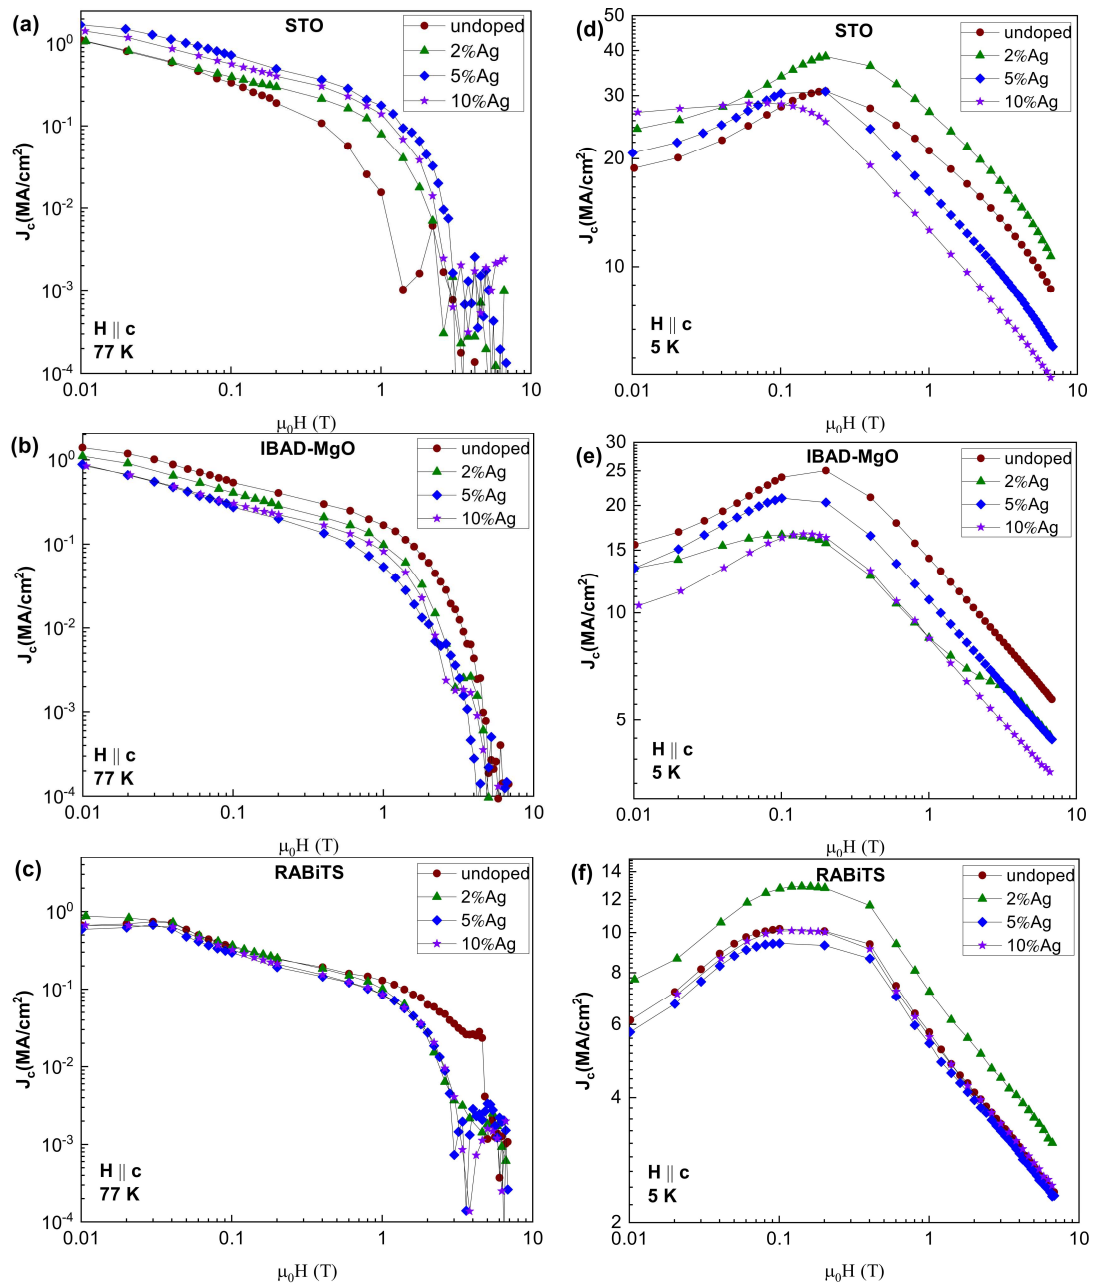

**Figure S3.** Dependence of the critical current density  $J_c$  on: (a–c) temperature and (d–f) magnetic field for undoped and Ag-doped YBCO films deposited on the different templates.



### SHPM measurements

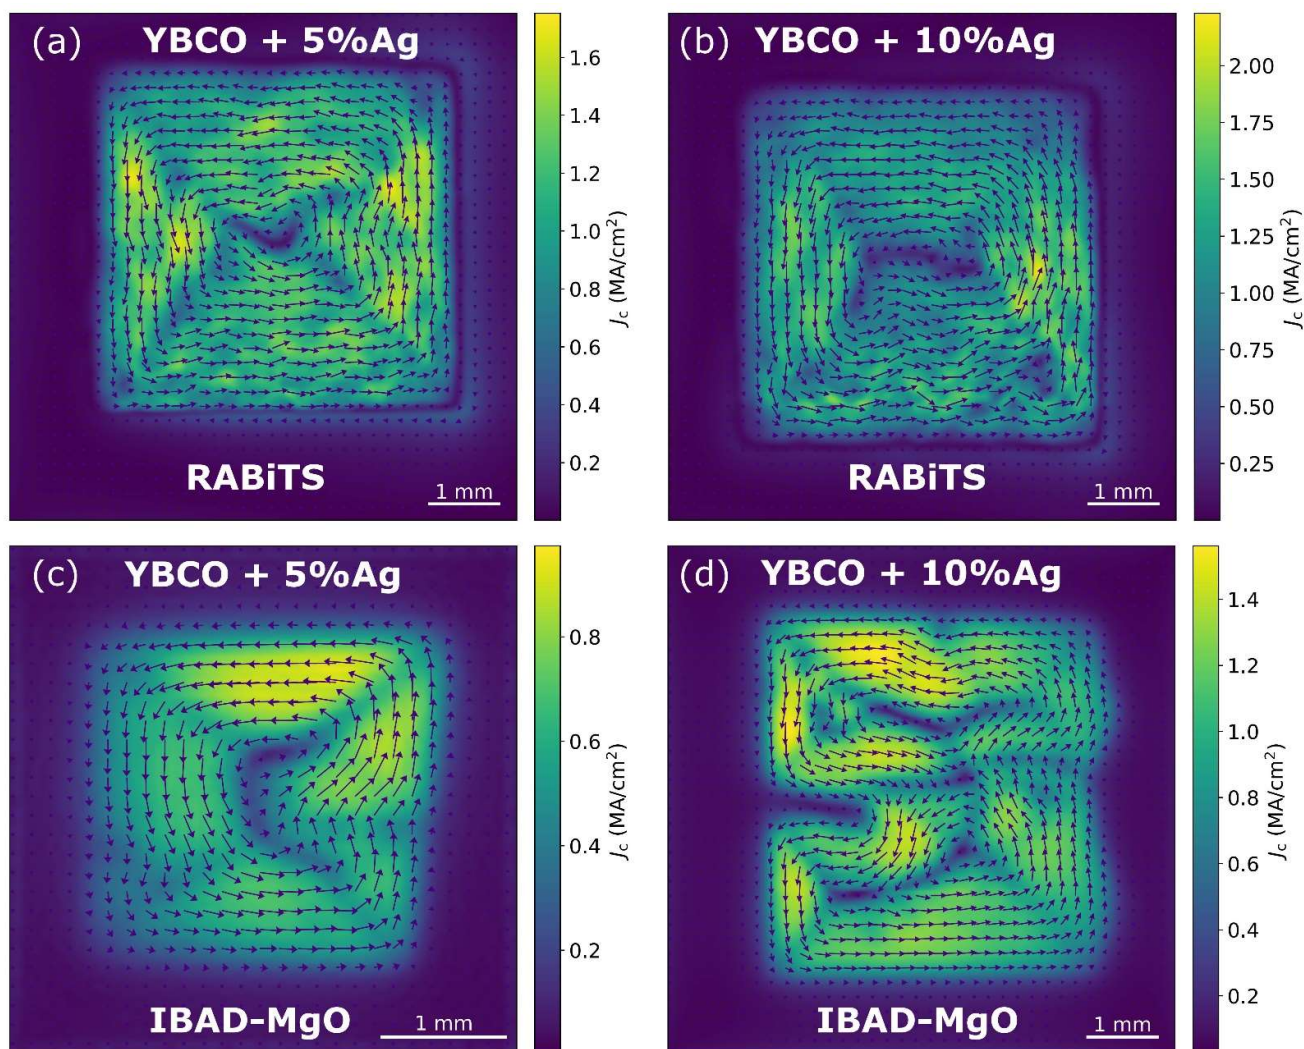

**Figure S4.** Local critical current density distribution of the undoped and Ag-doped YBCO films calculated from SHPM maps on: (a-b) RABiTS and (c-d) IBAD-MgO.
